# Supplementary material for: PD-L1 signaling on human memory CD4+ T cells induces a regulatory phenotype
Source: PubMed Central journal article supplement (PMC8101994; doi:10.1371/journal.pbio.3001199), 2021-04-26
Supplement: pbio.3001199.s014.pdf [file pbio.3001199.s014.pdf]

Figure 5A

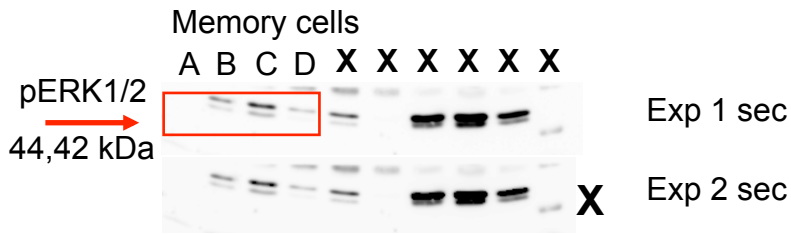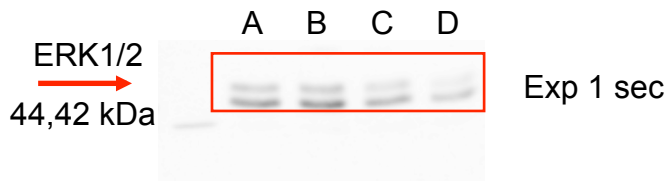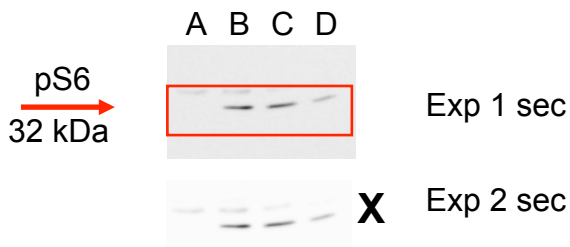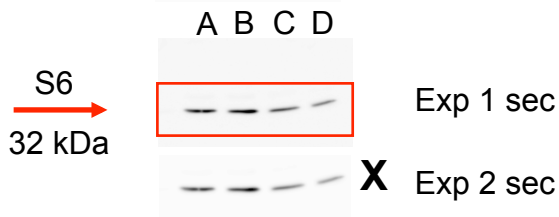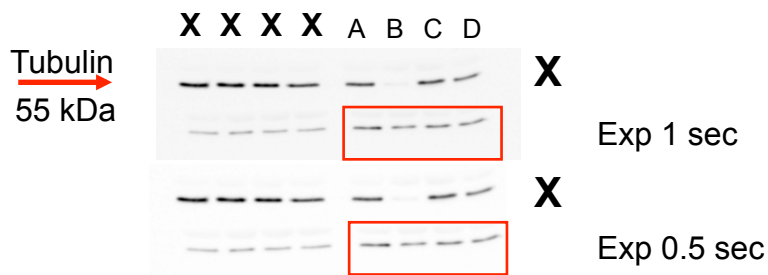

A = Unst C =  $\alpha$ CD3/ $\alpha$ CD28  
B =  $\alpha$ CD3 D =  $\alpha$ CD3/ $\alpha$ PD-L1

Figure 6C

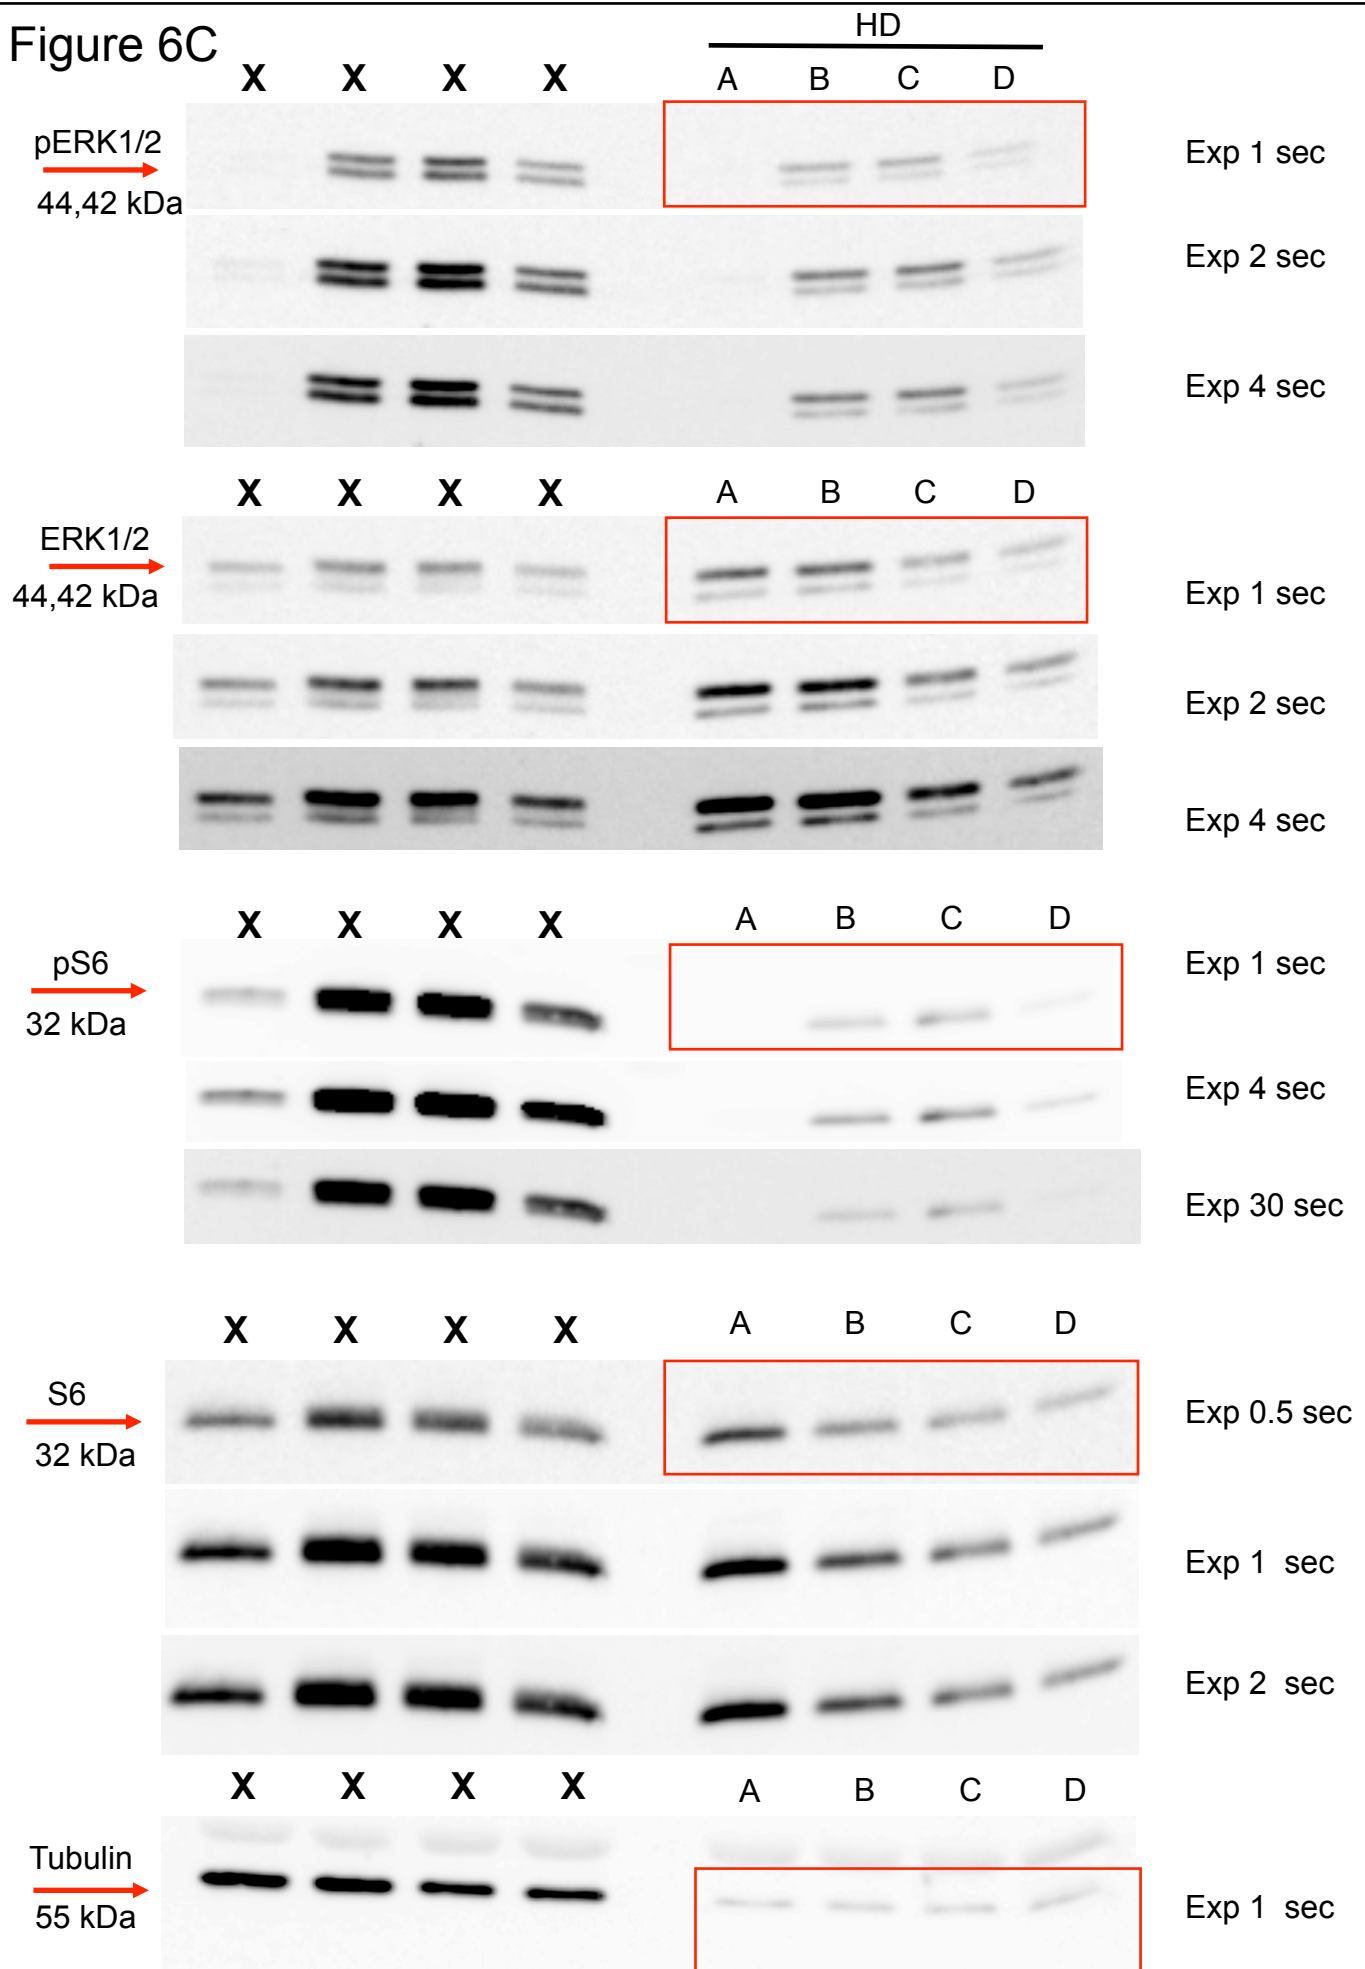

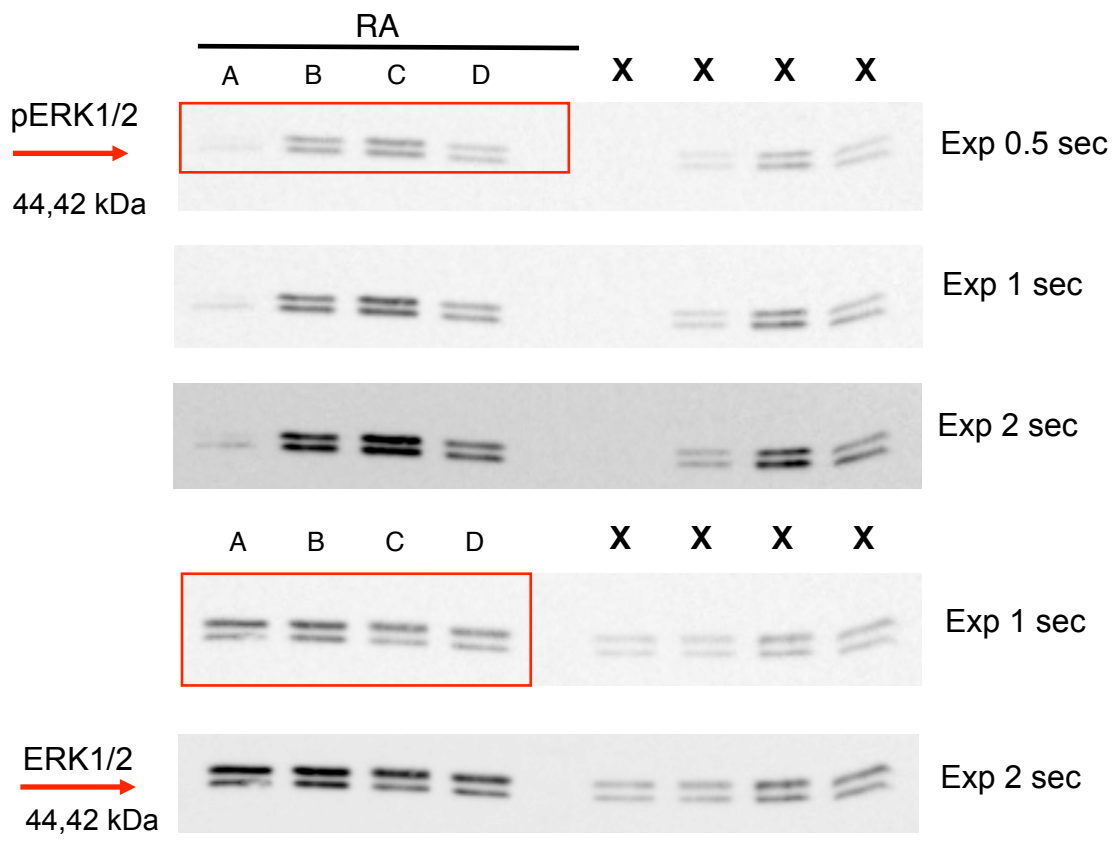

A = Unst      C = αCD3/αCD28  
 B = αCD3      D = αCD3/αPD-L1

Figure 6D

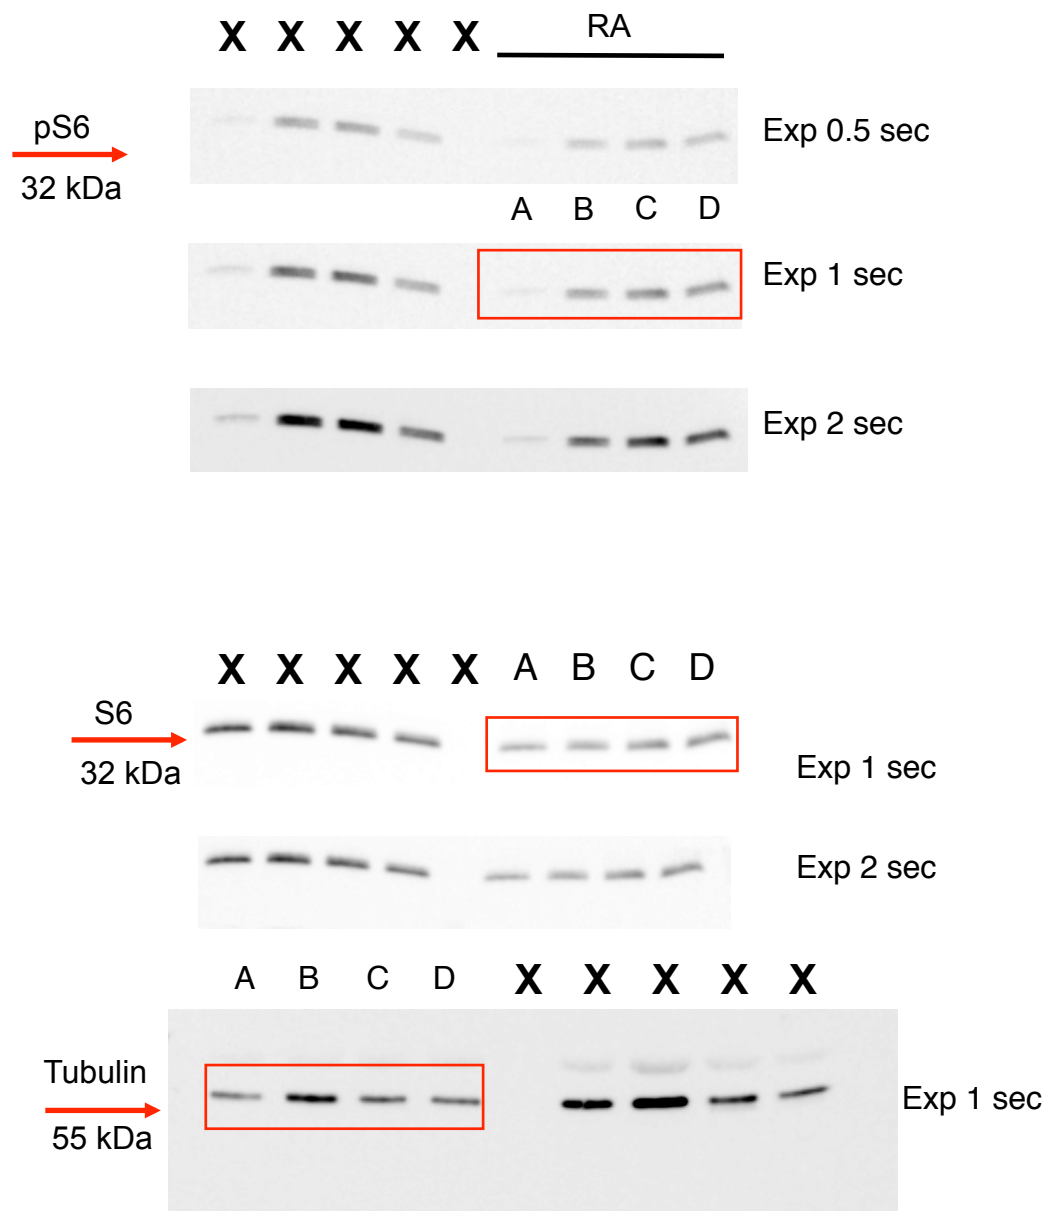

A = Unst    C = αCD3/αCD28  
 B = αCD3    D = αCD3/αPD-L1

Figure 6D
